# Supplementary material for: Nonsynonymous, synonymous and nonsense mutations in human cancer-related genes undergo stronger purifying selections than expectation
Source: Springer Nature journal article supplement (doi:10.1186/s12885-019-5572-x), 2019-04-16

A

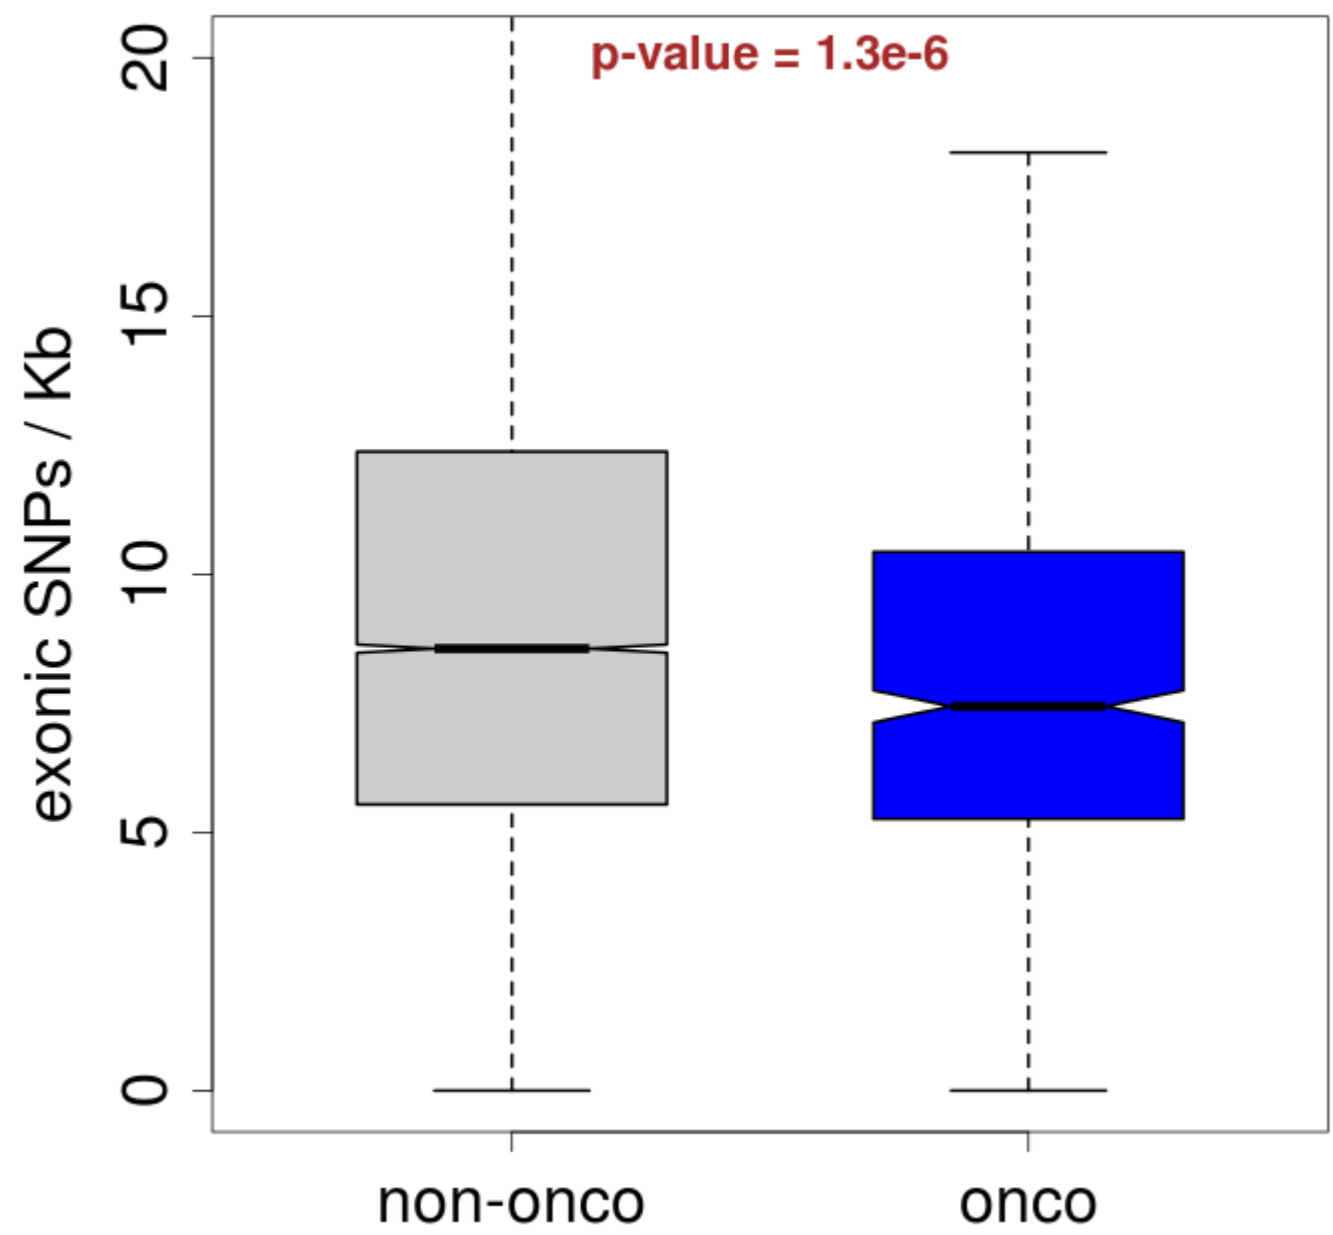

B

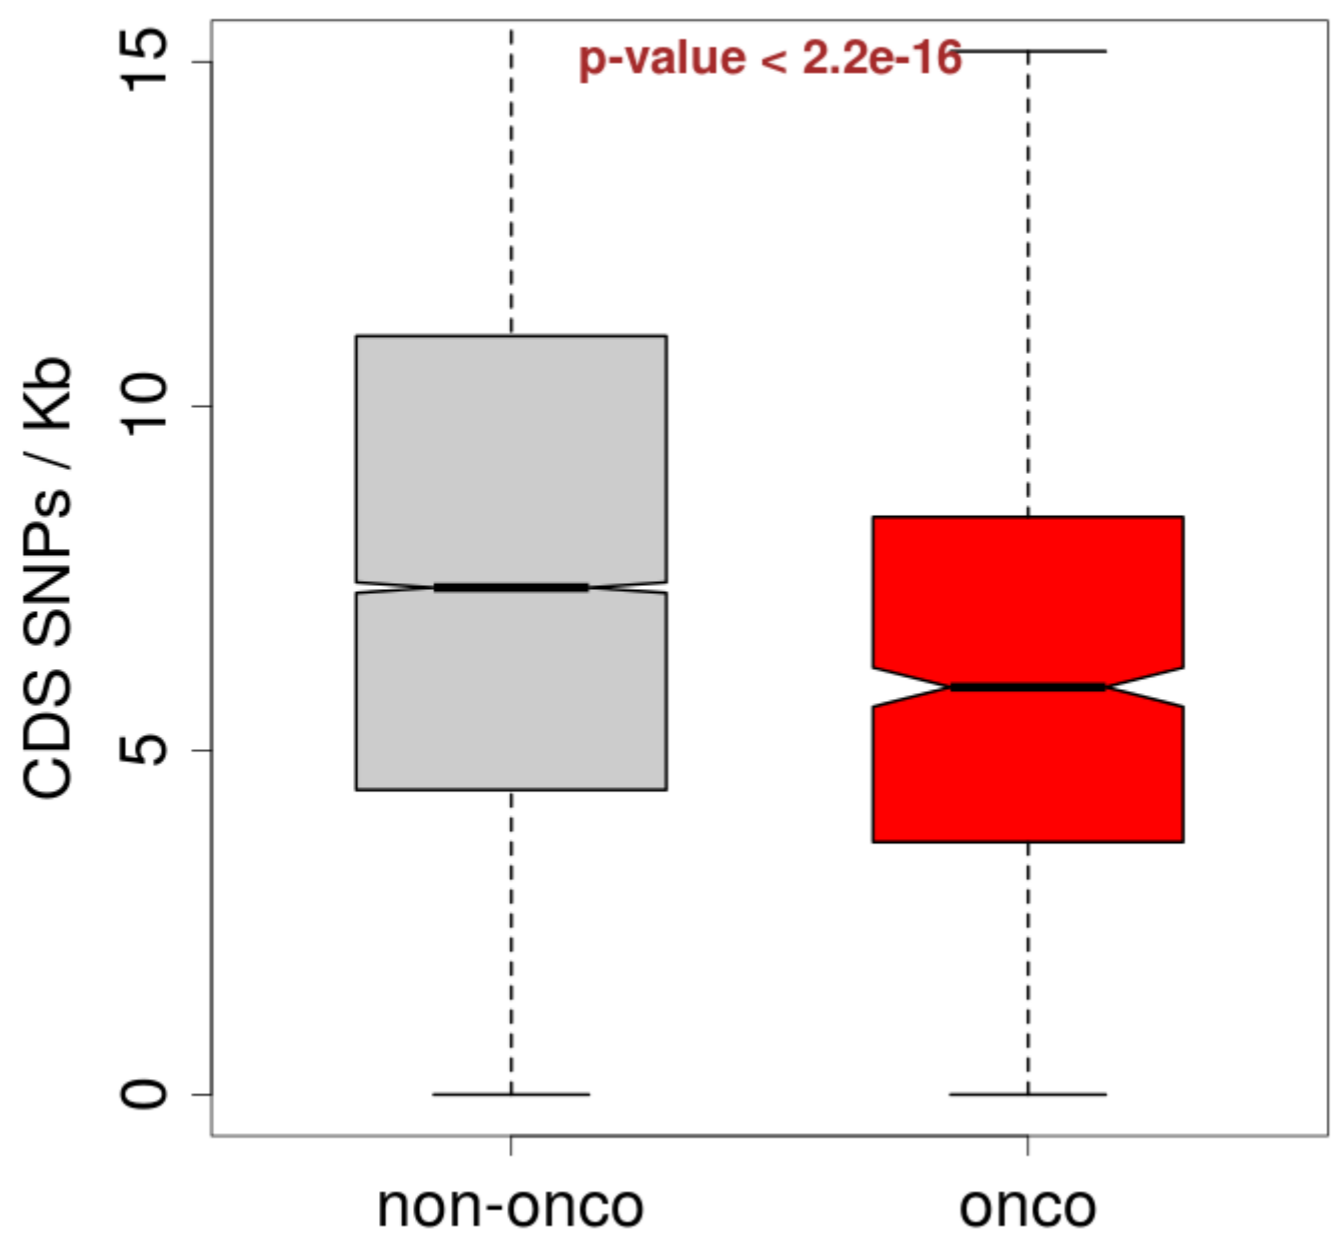

C

Number of exonic SNPs:  $\log_2(n+1)$

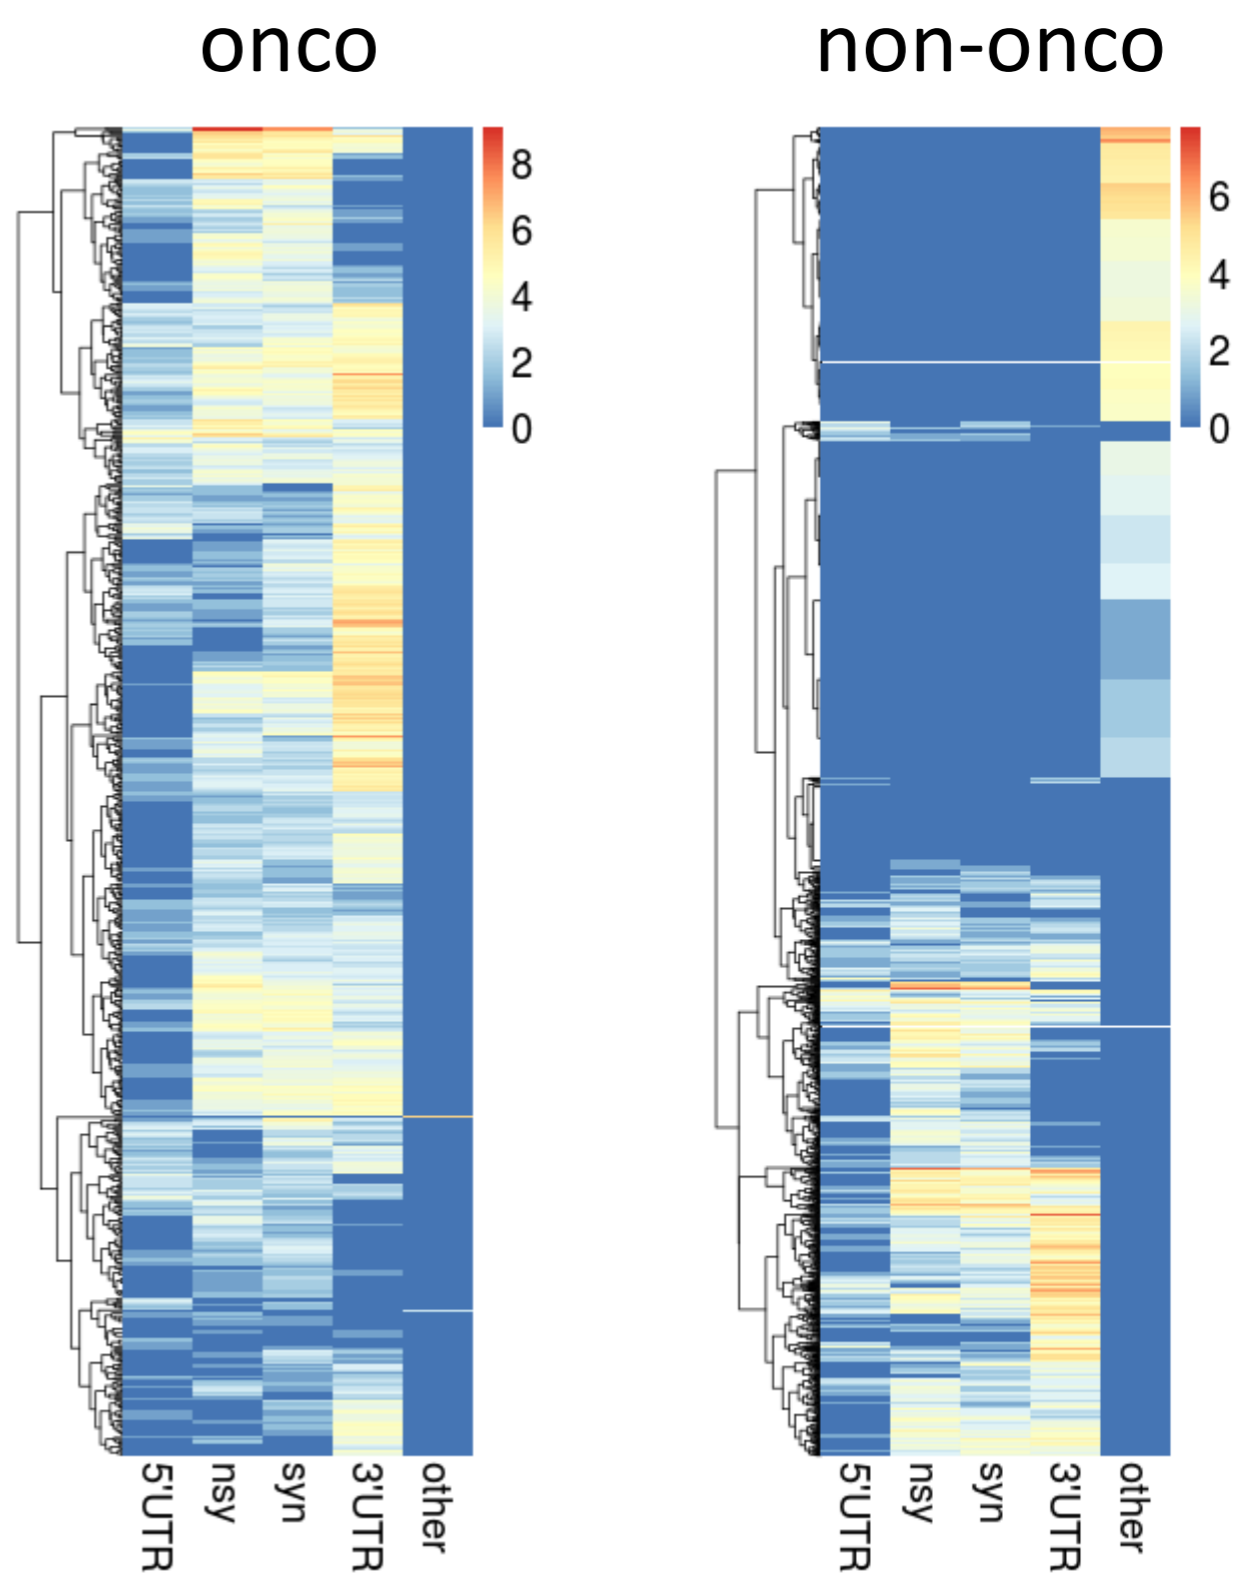

A

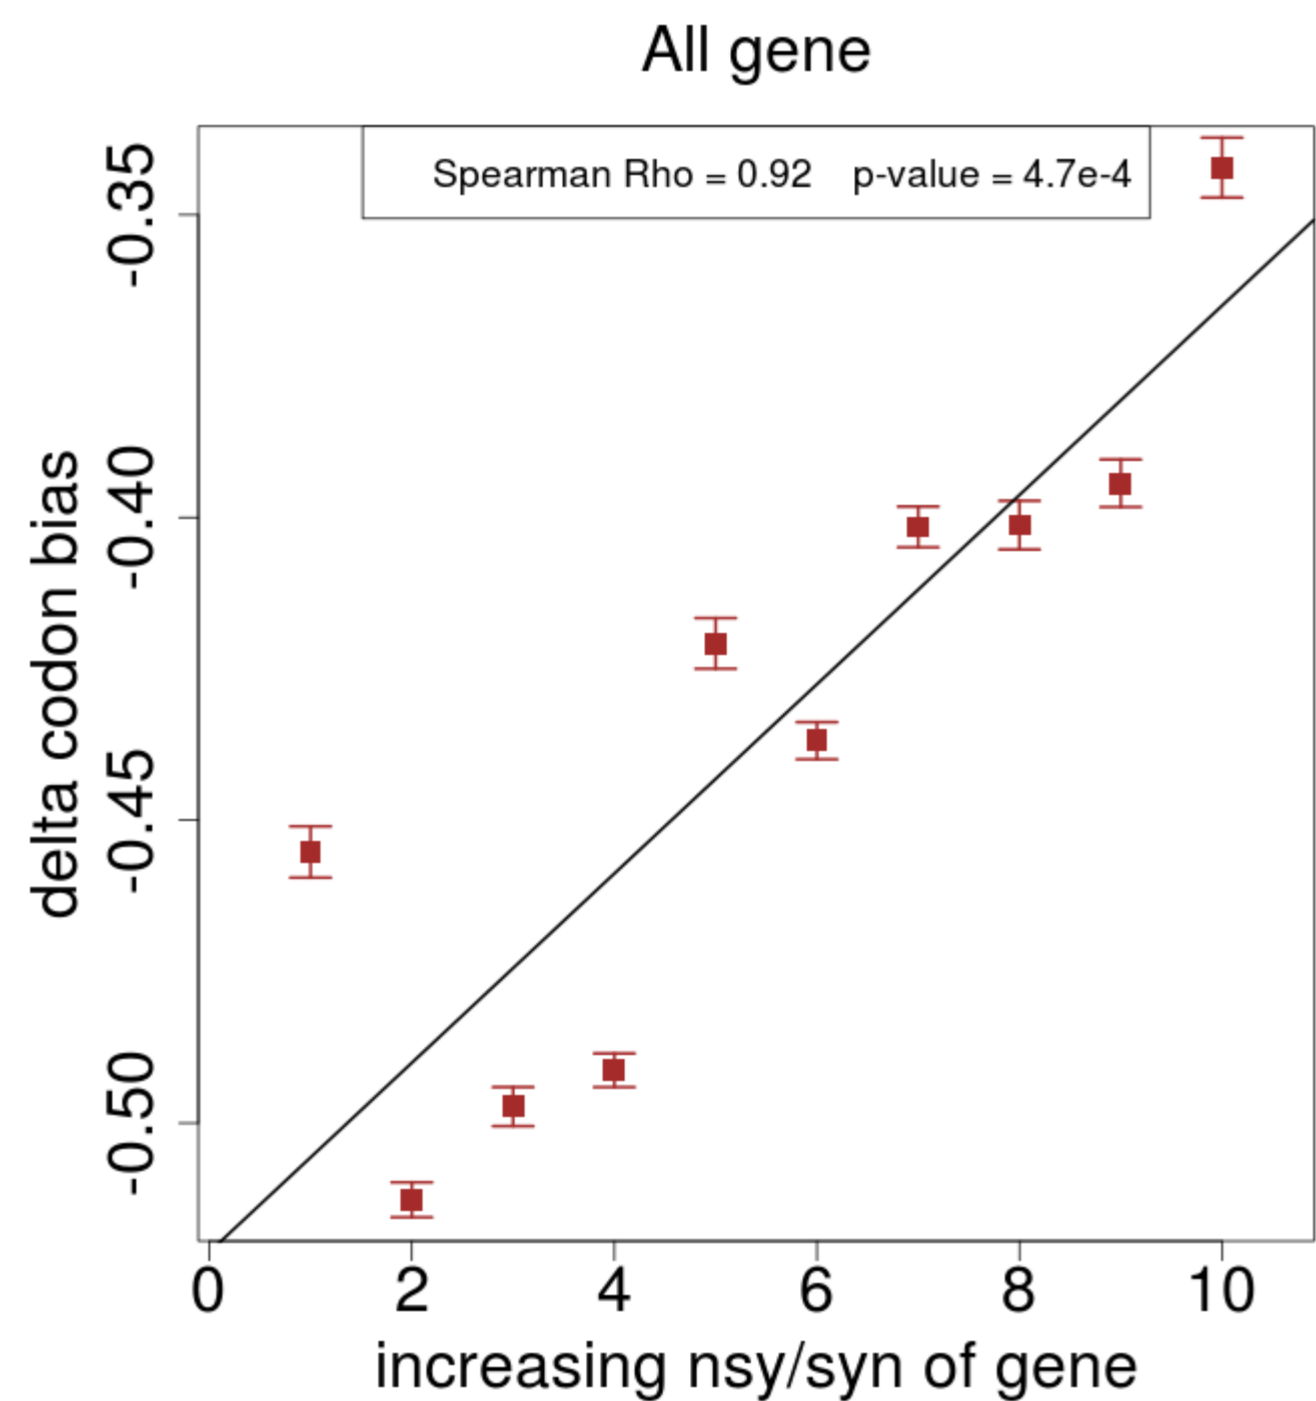

B

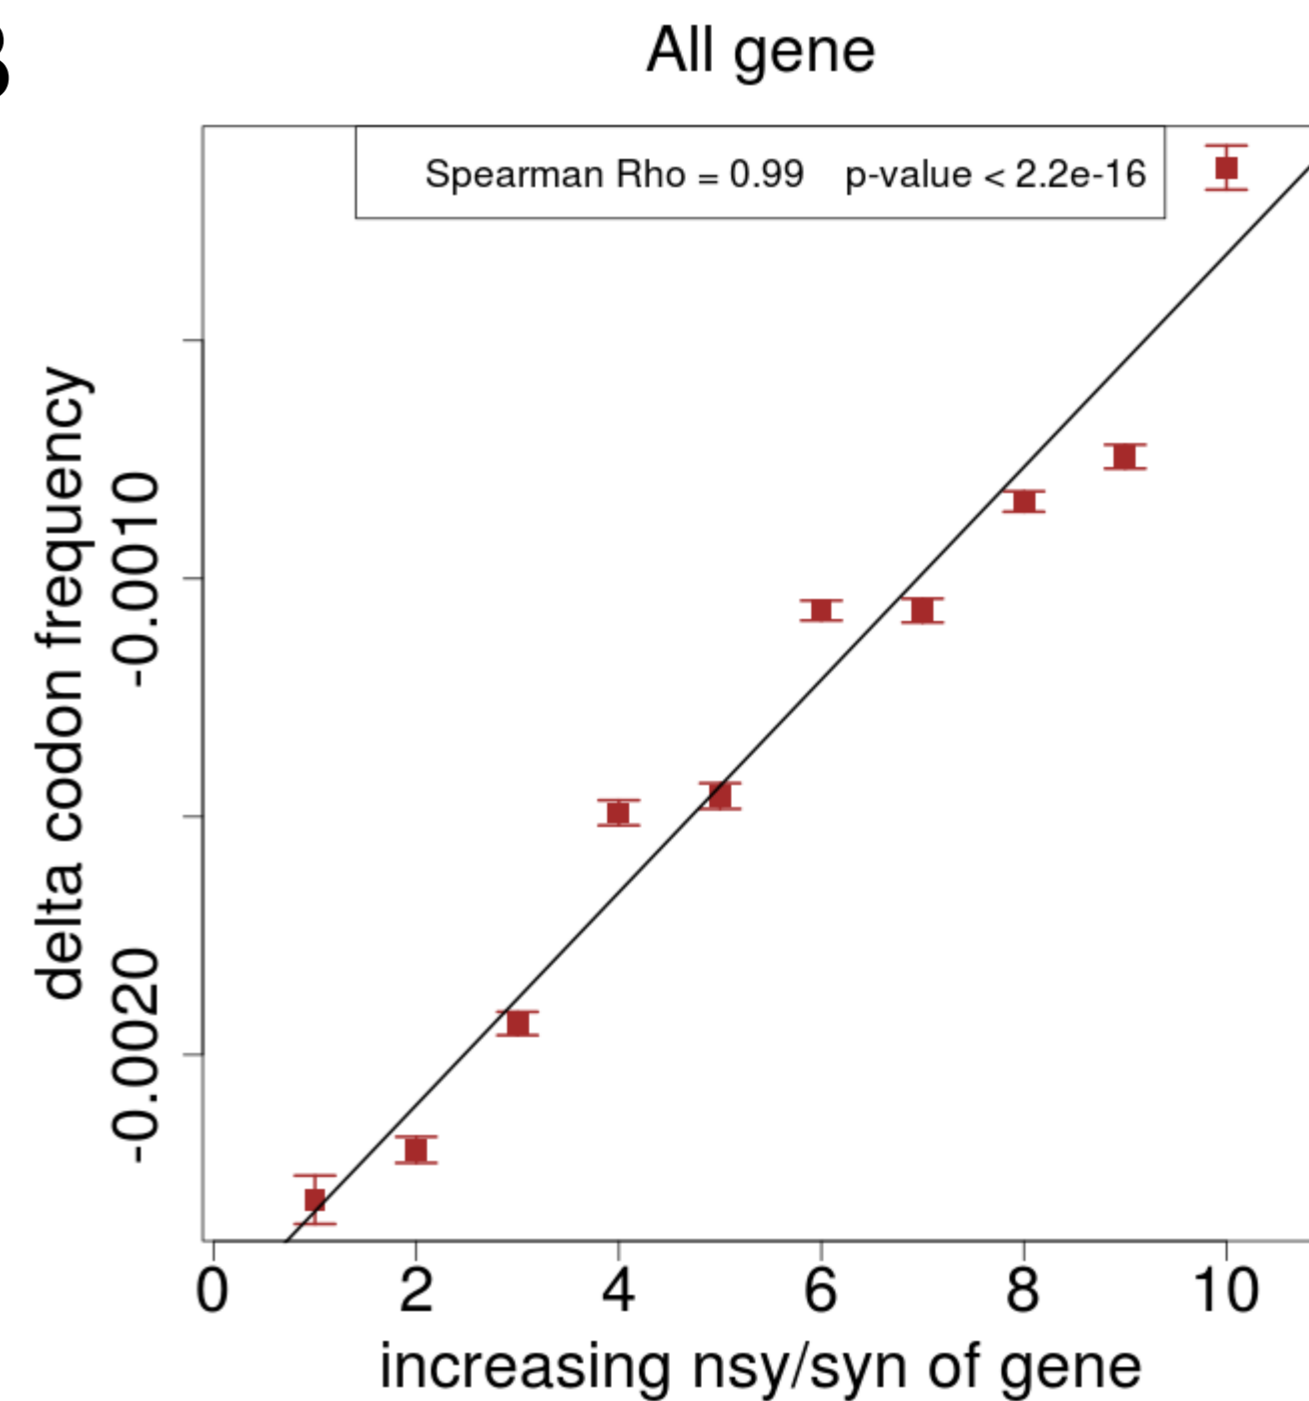

C

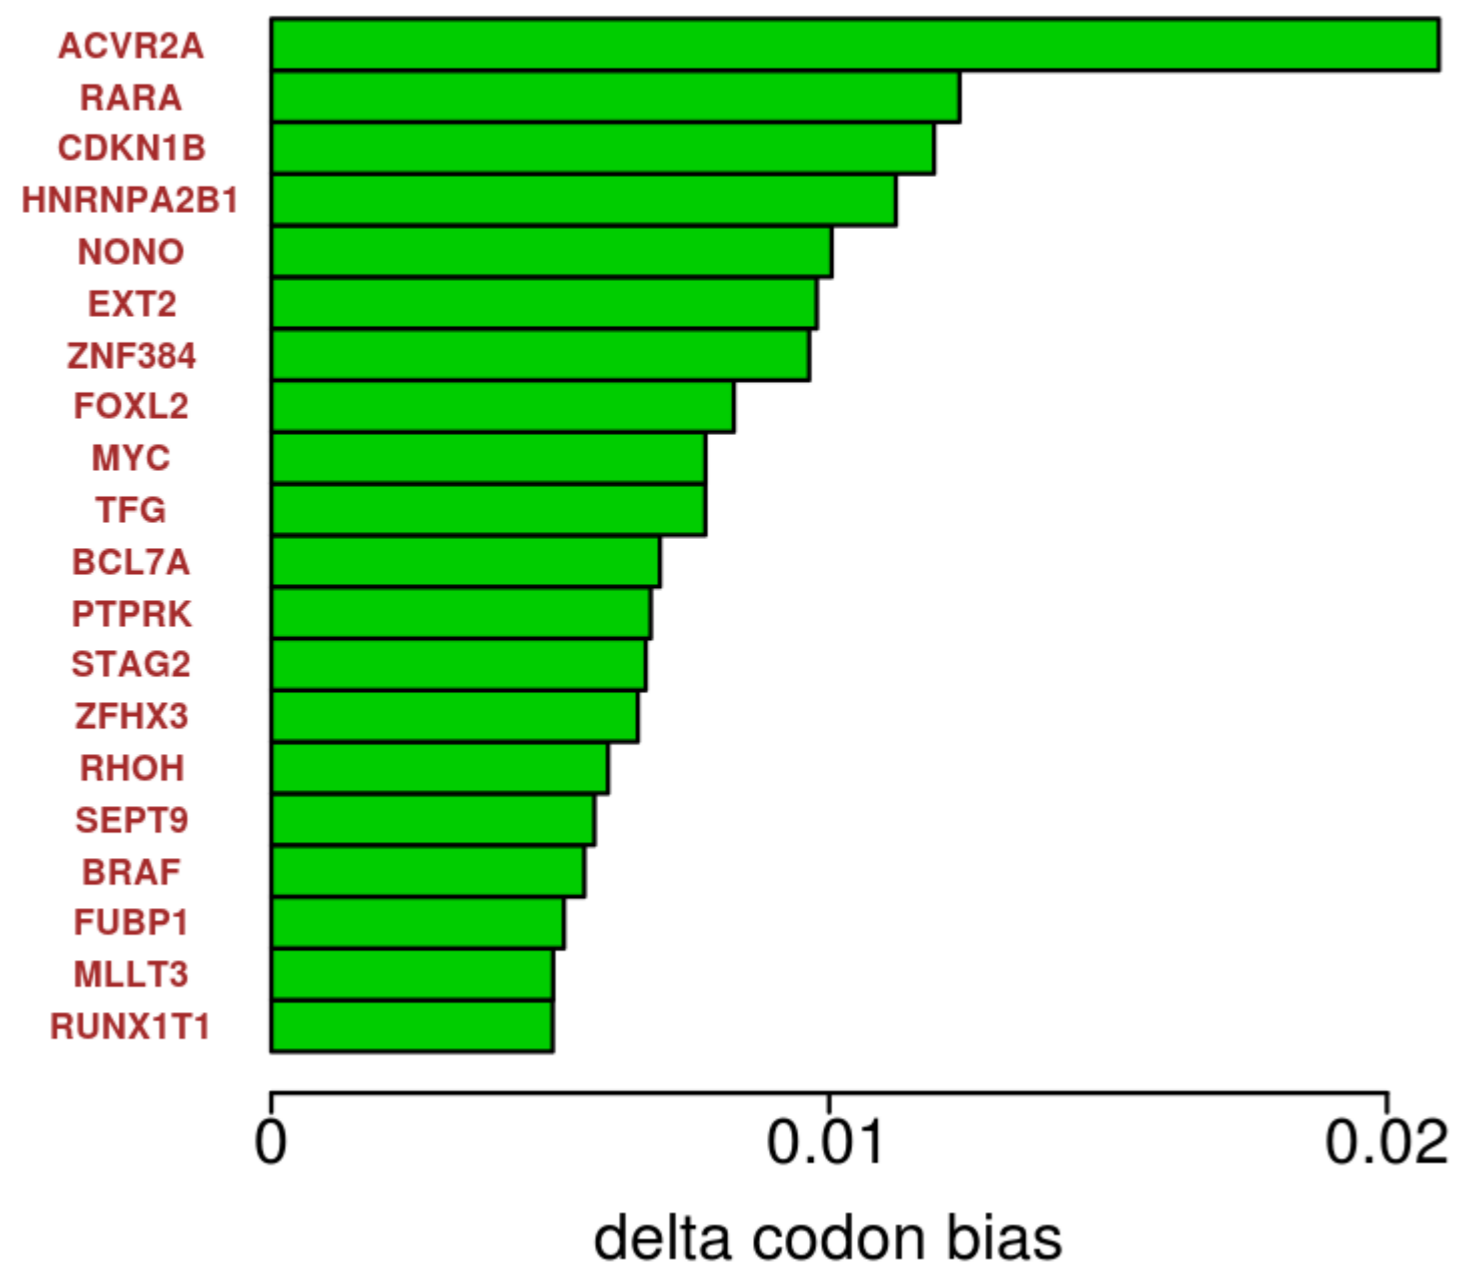

D

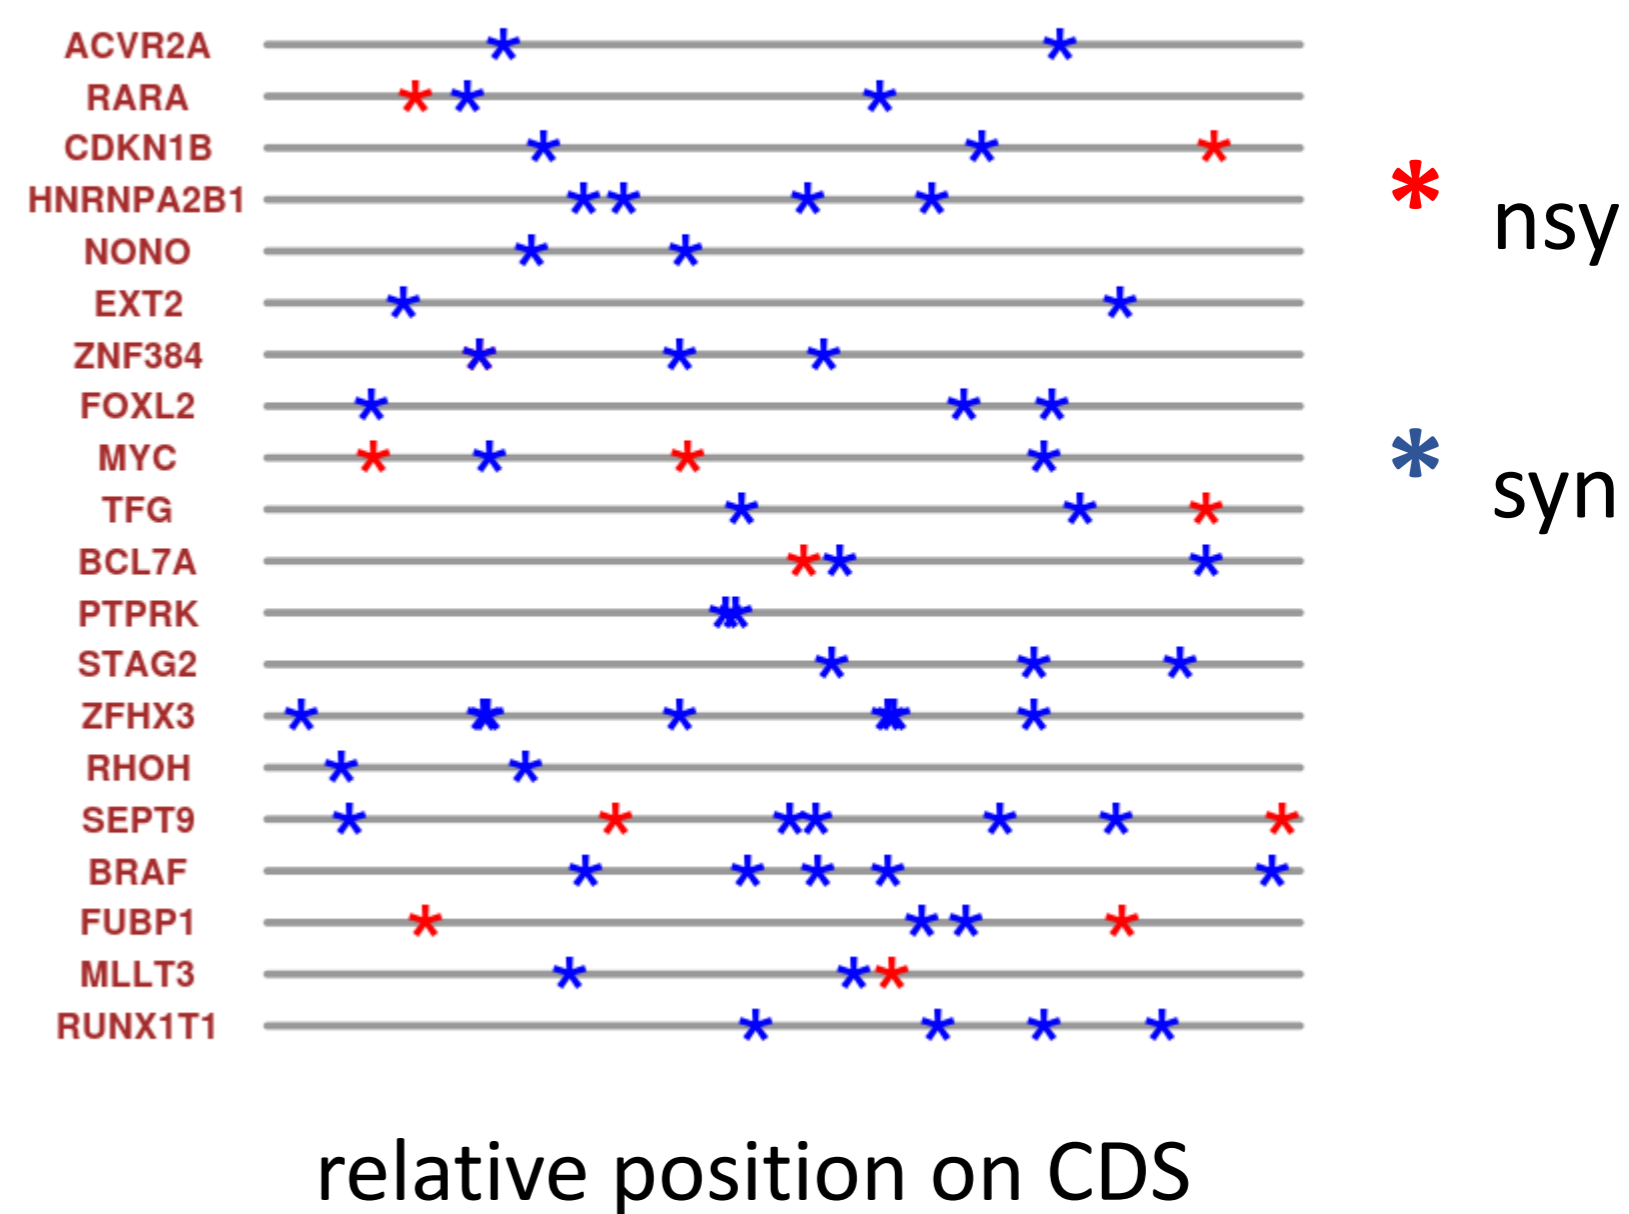

# Highly expressed genes

**A**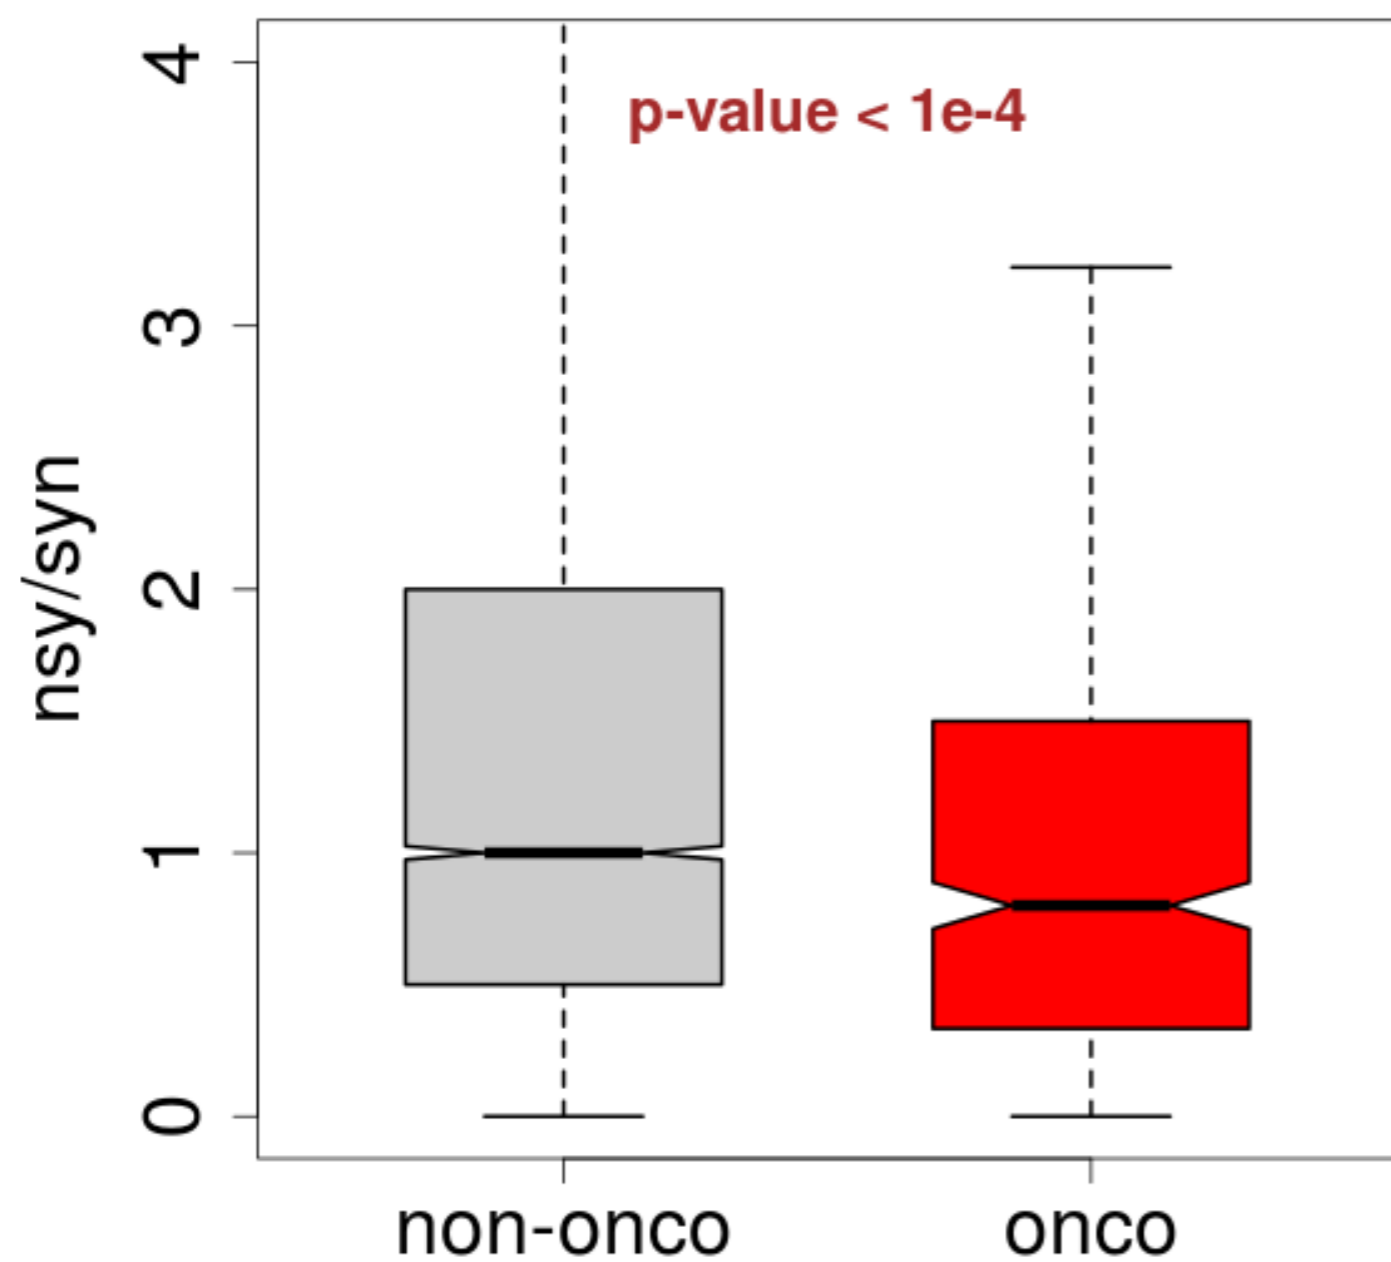**B**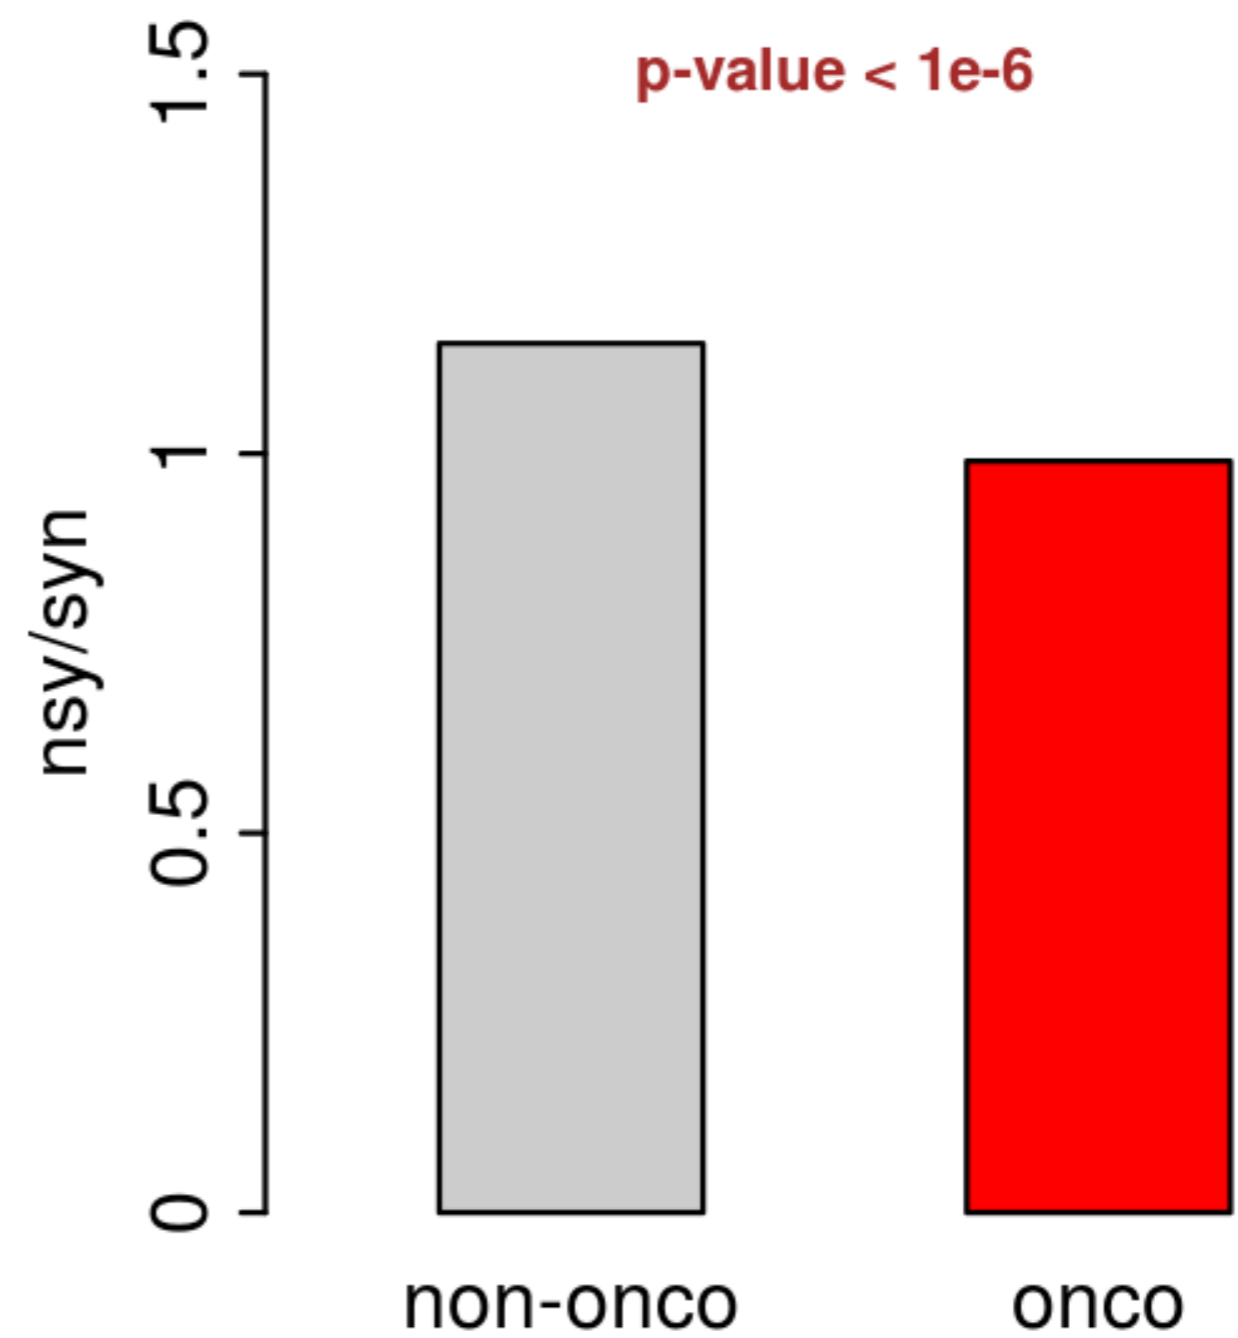**C**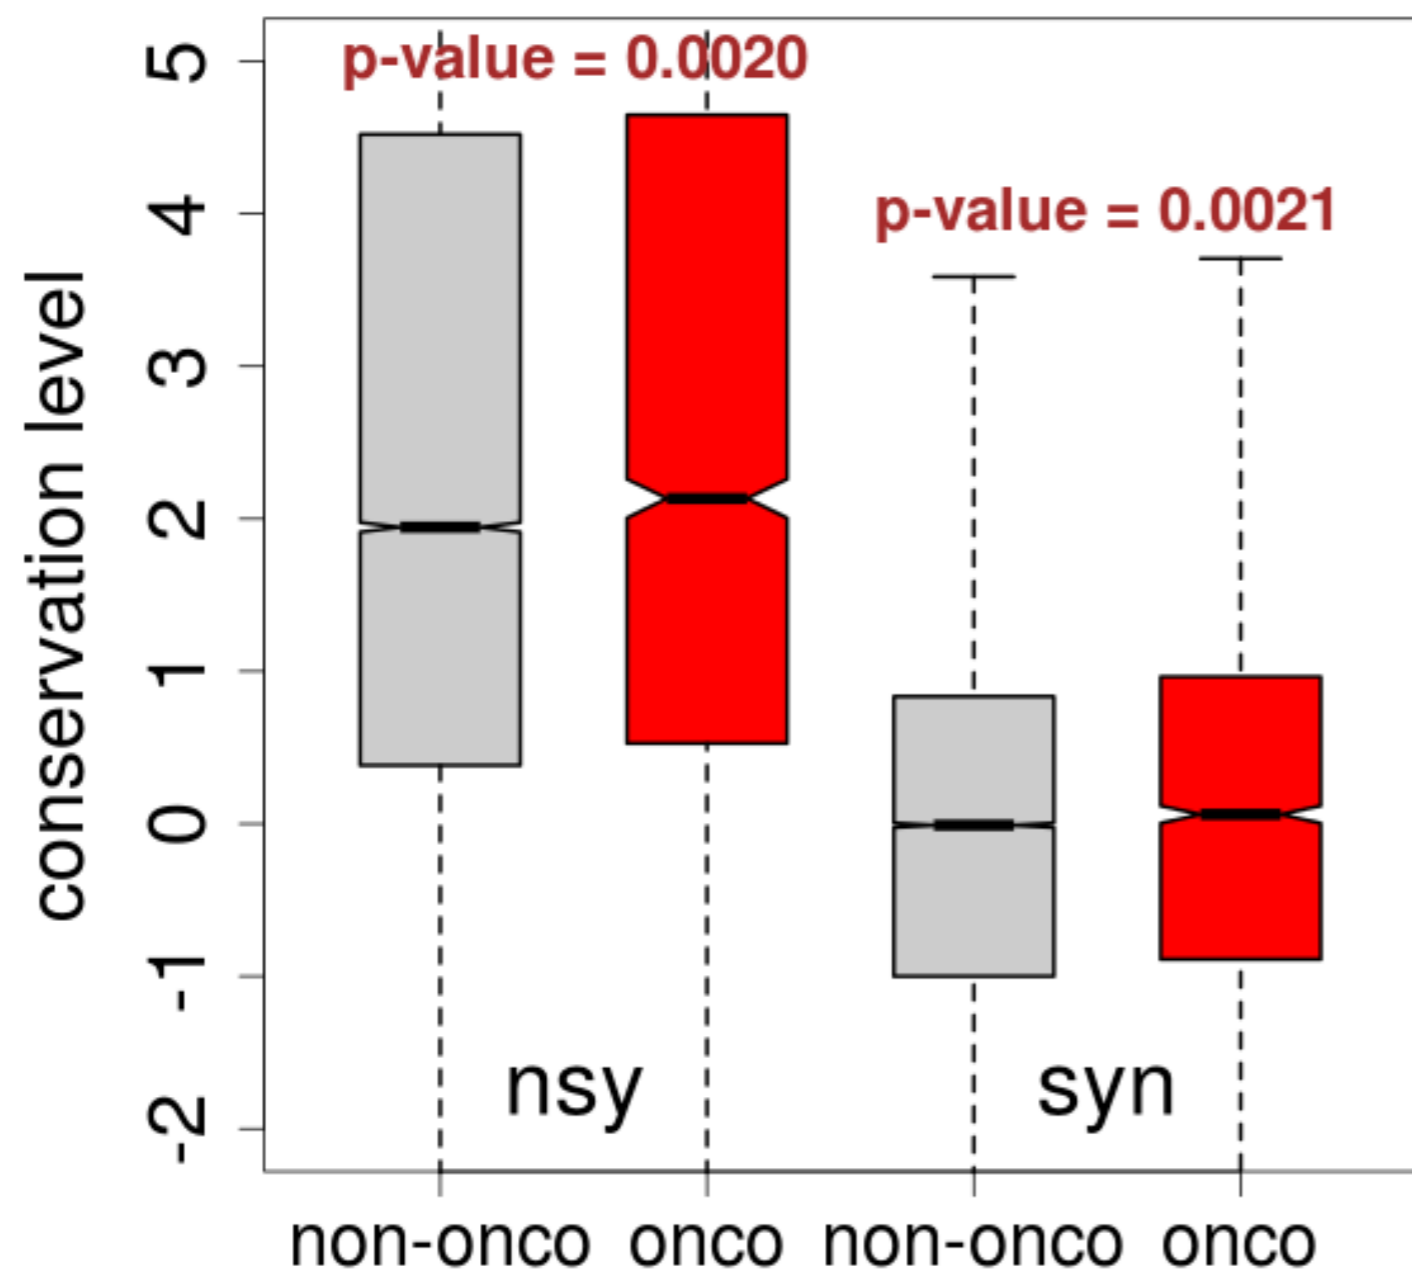**D**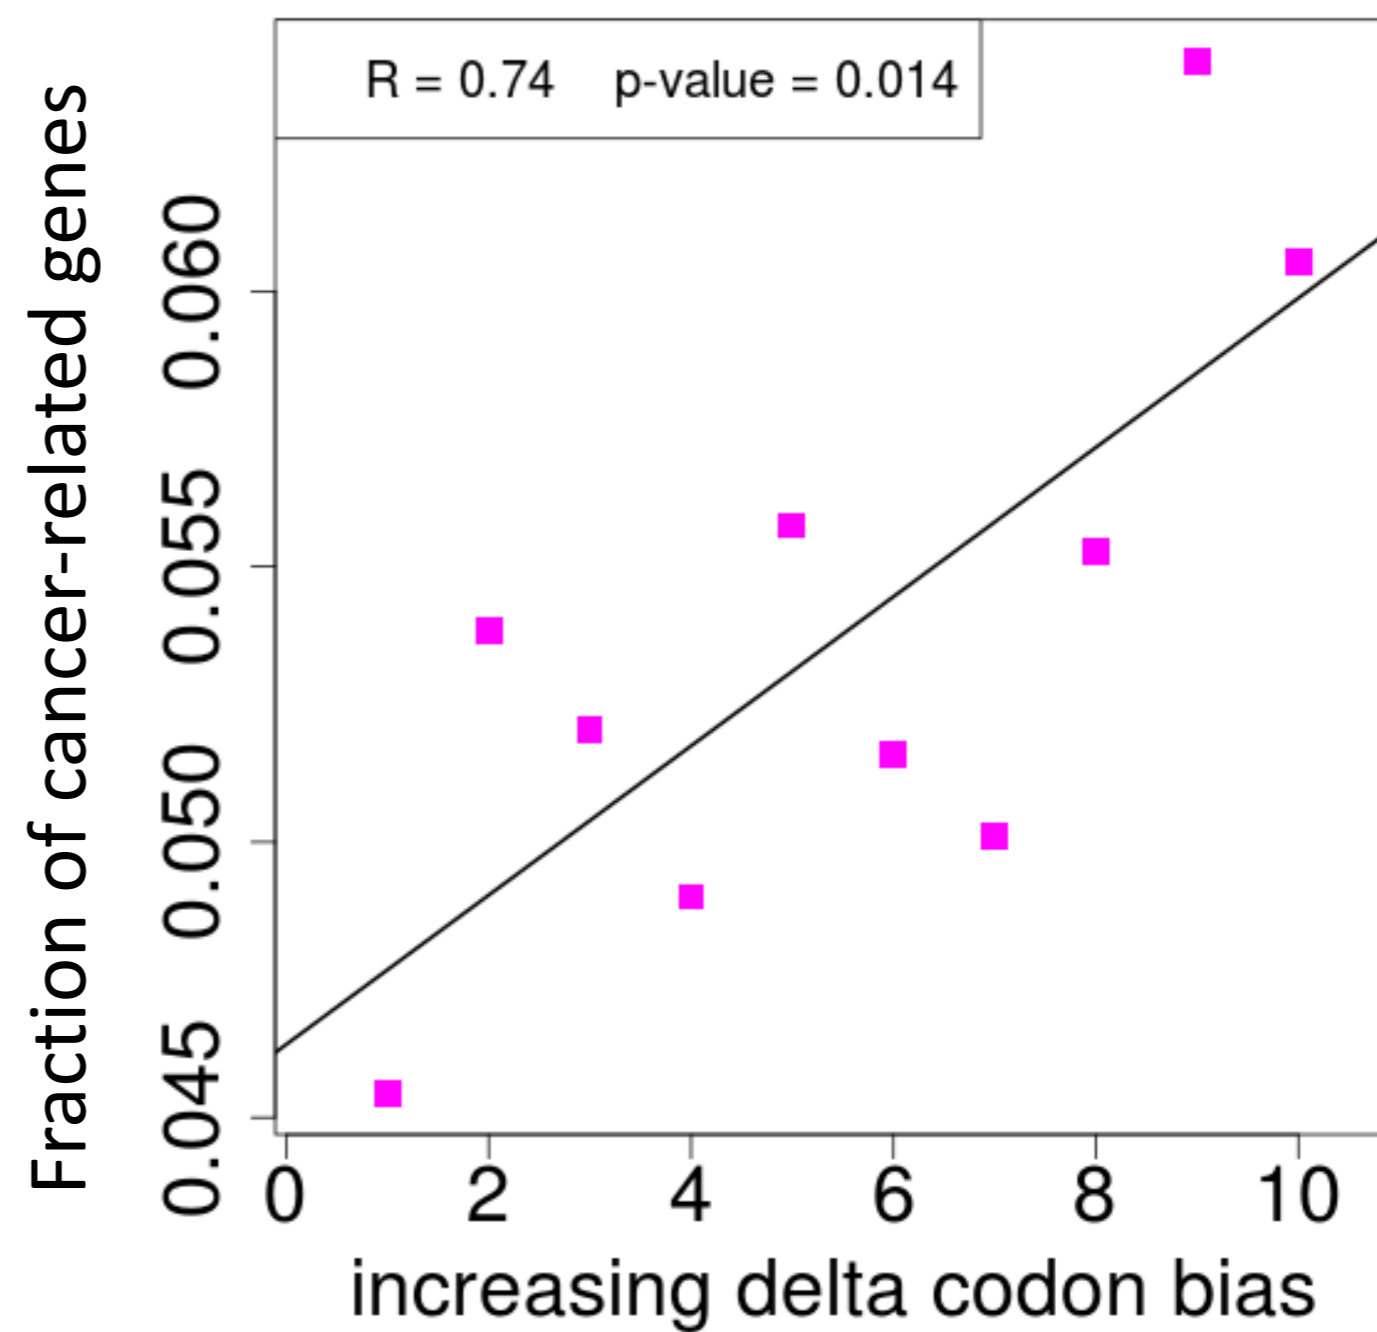

# Genes with high GC content

## A

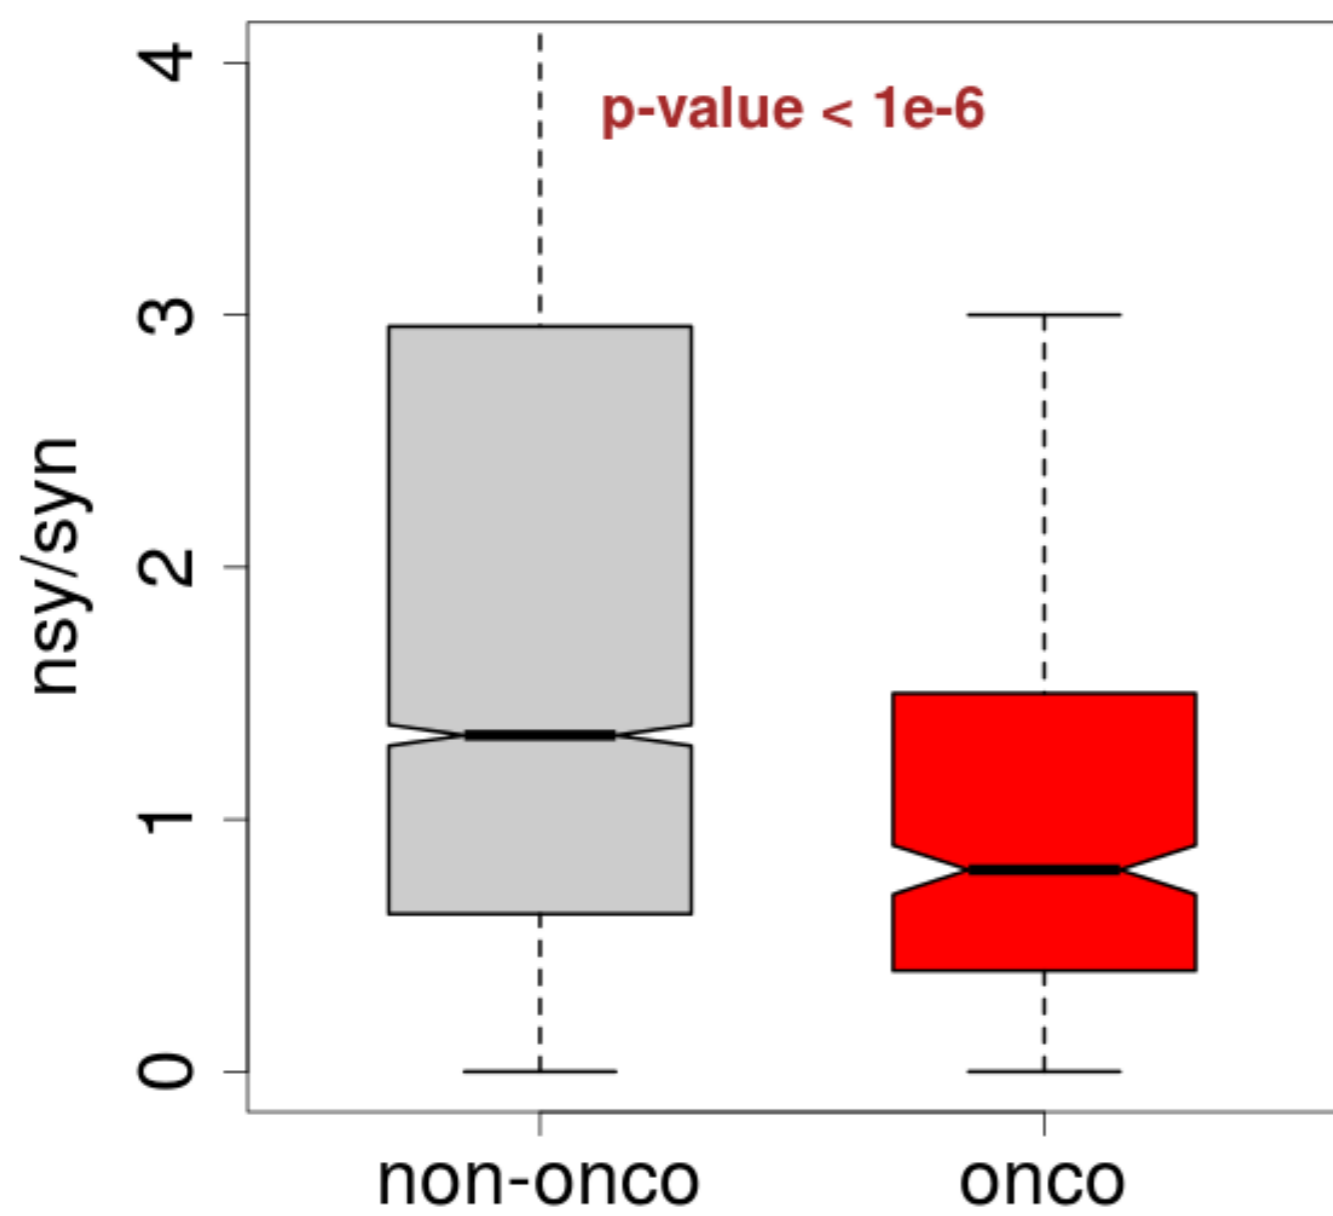

## B

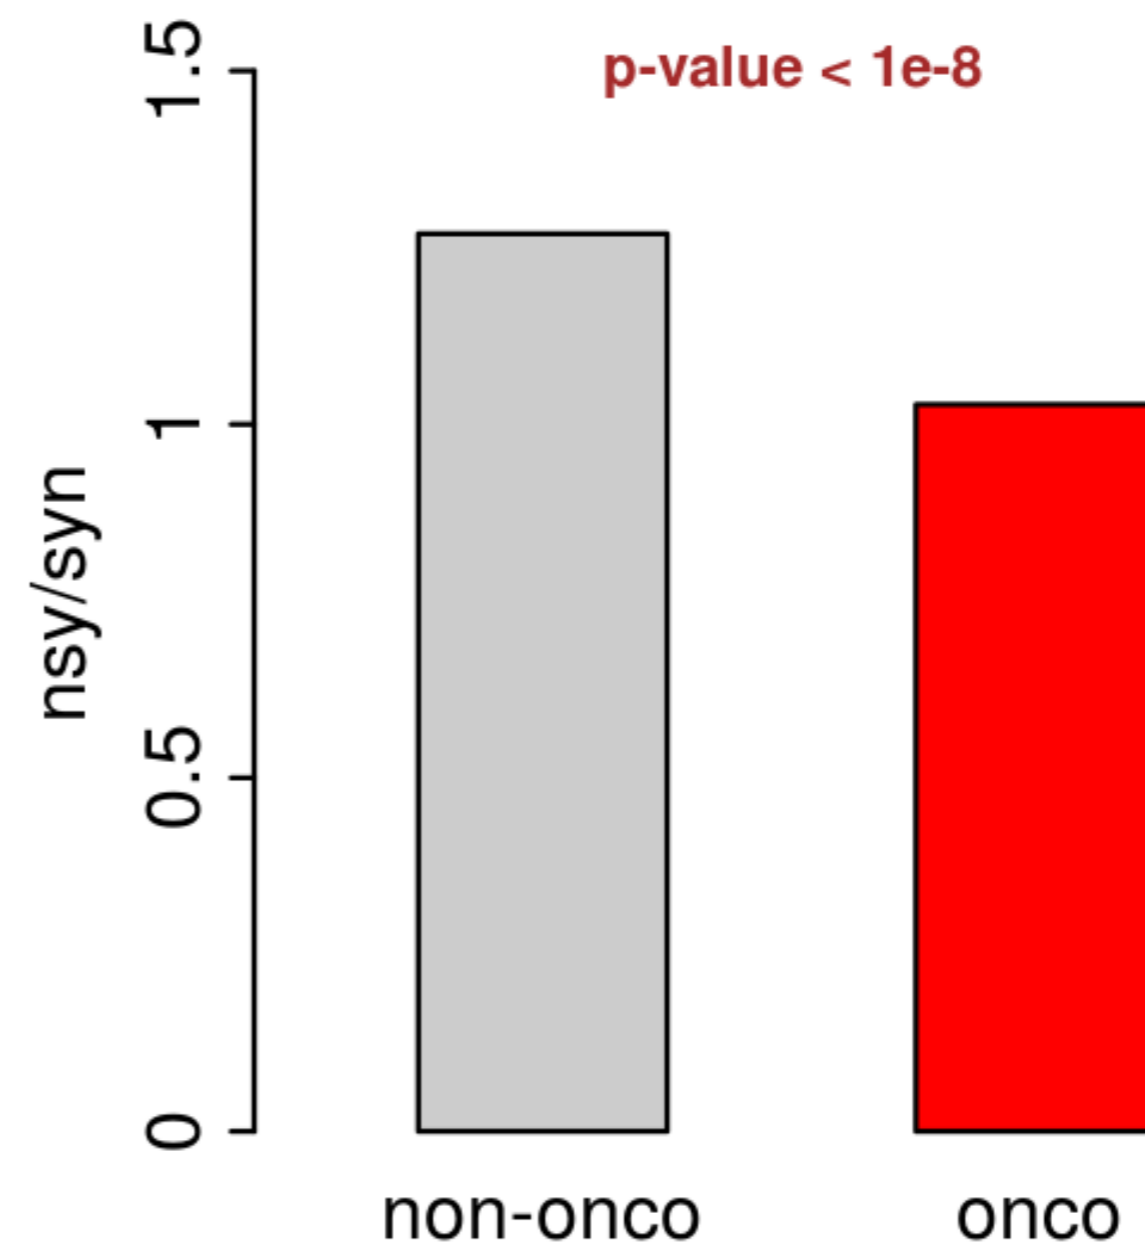

## C

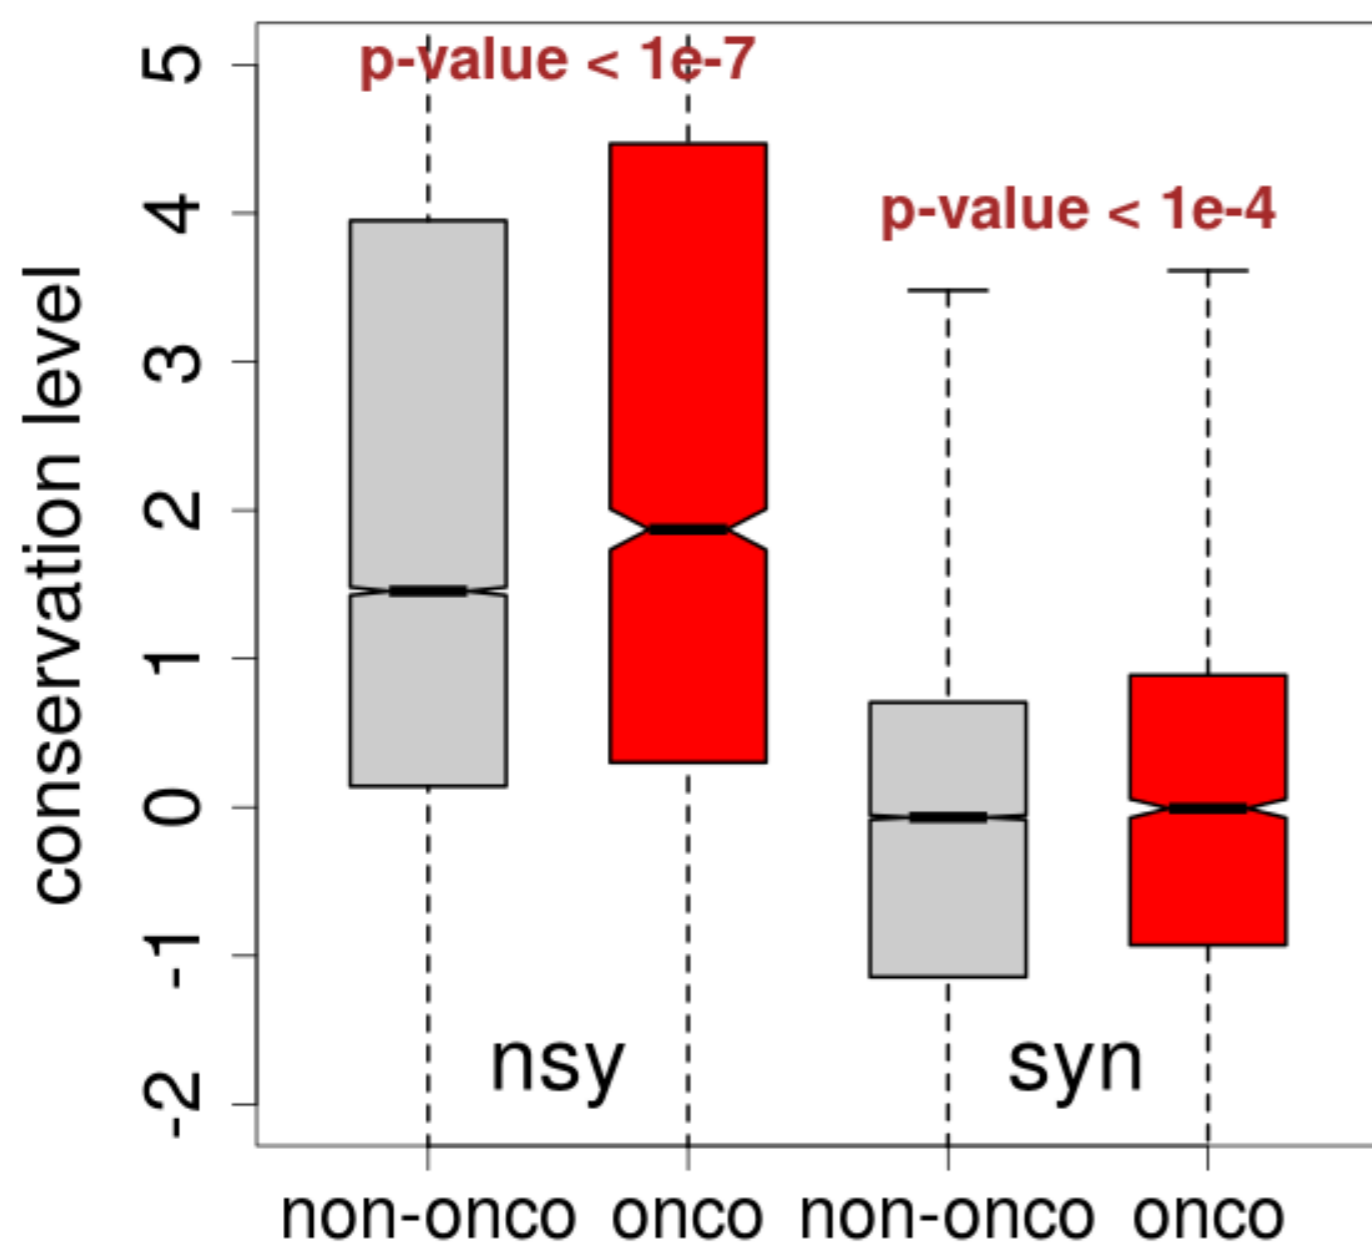

## D

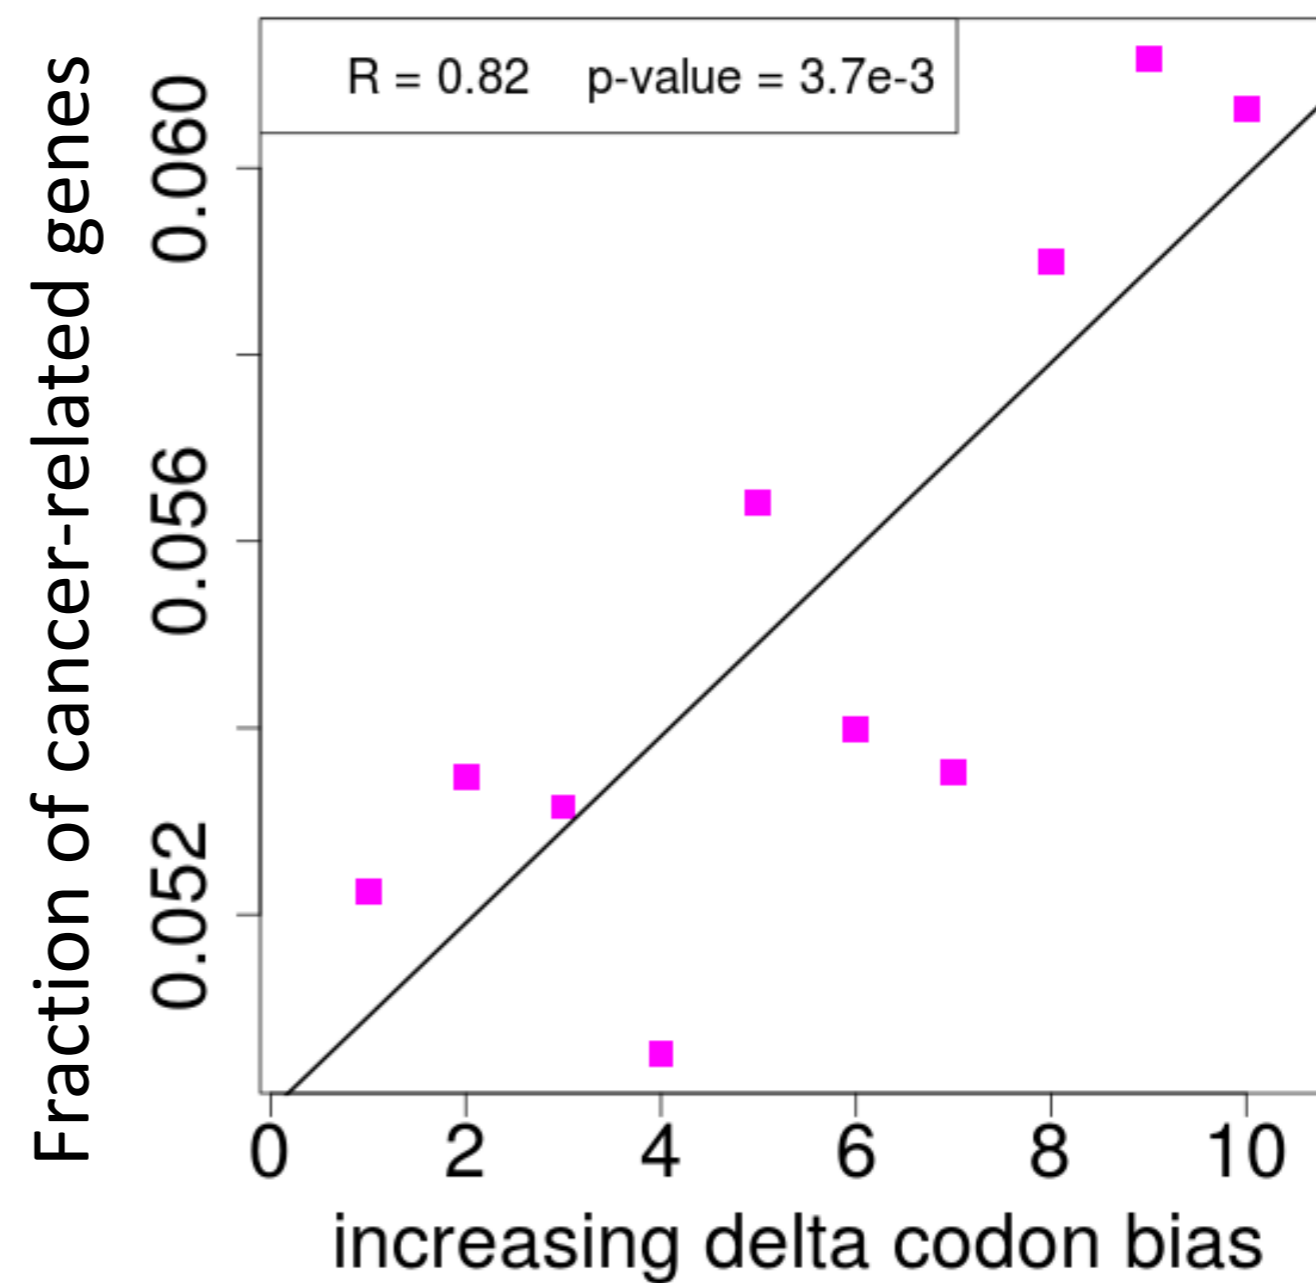

# Genes with low GC content

## A

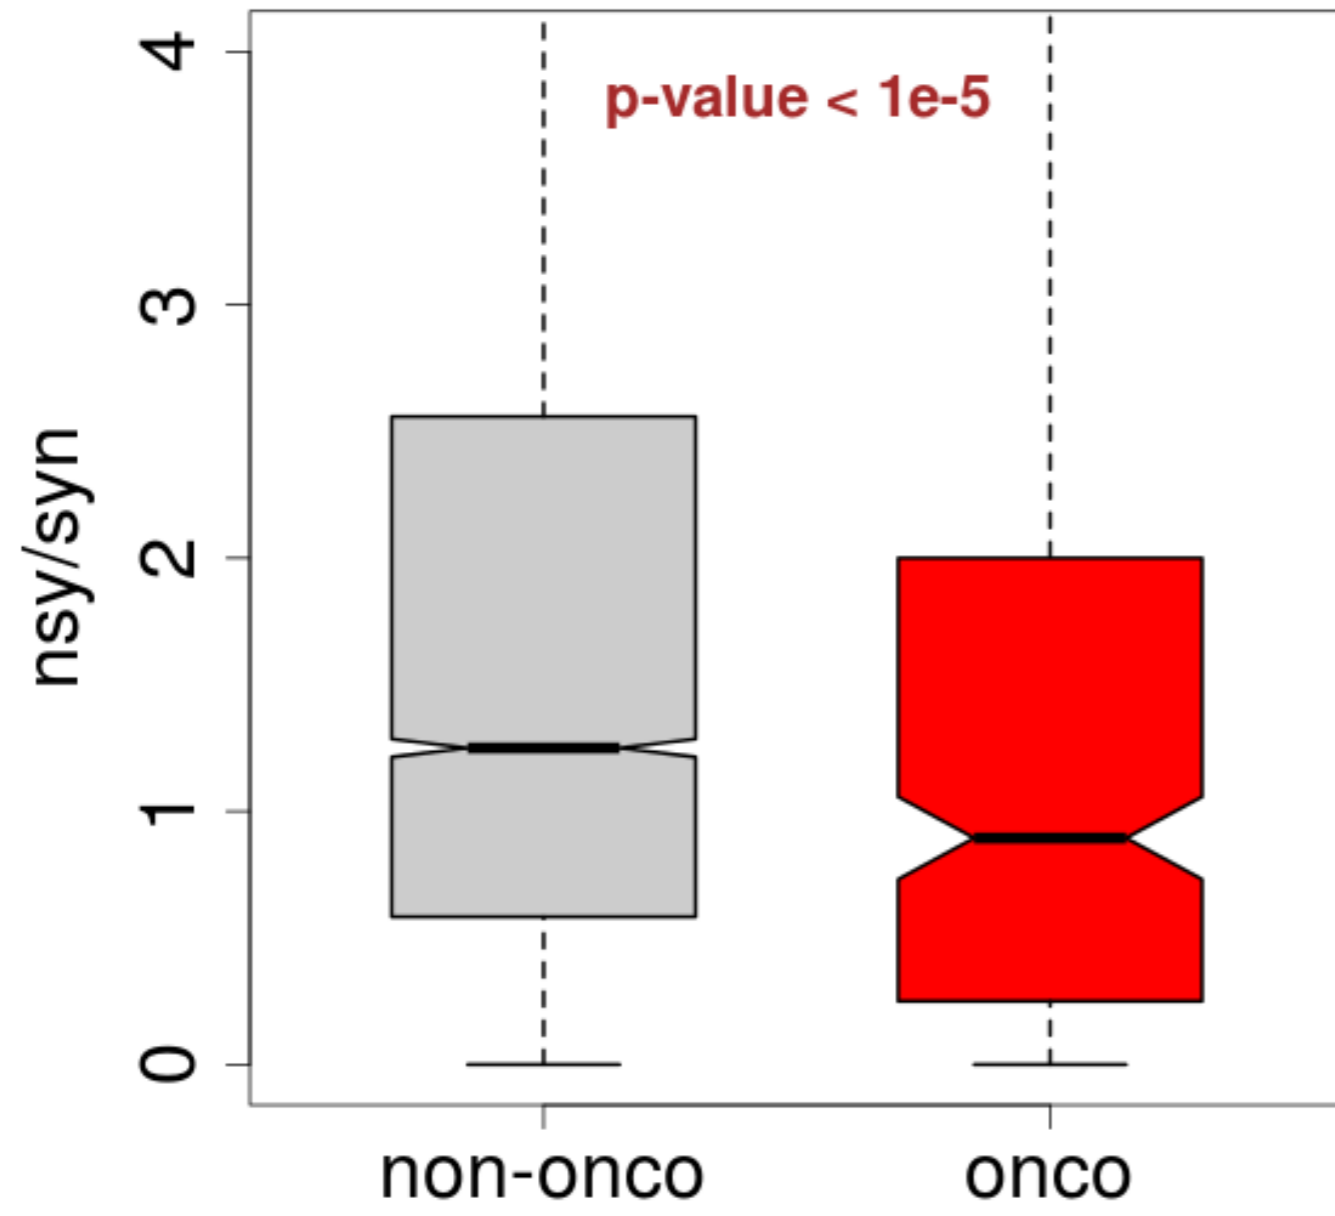

## B

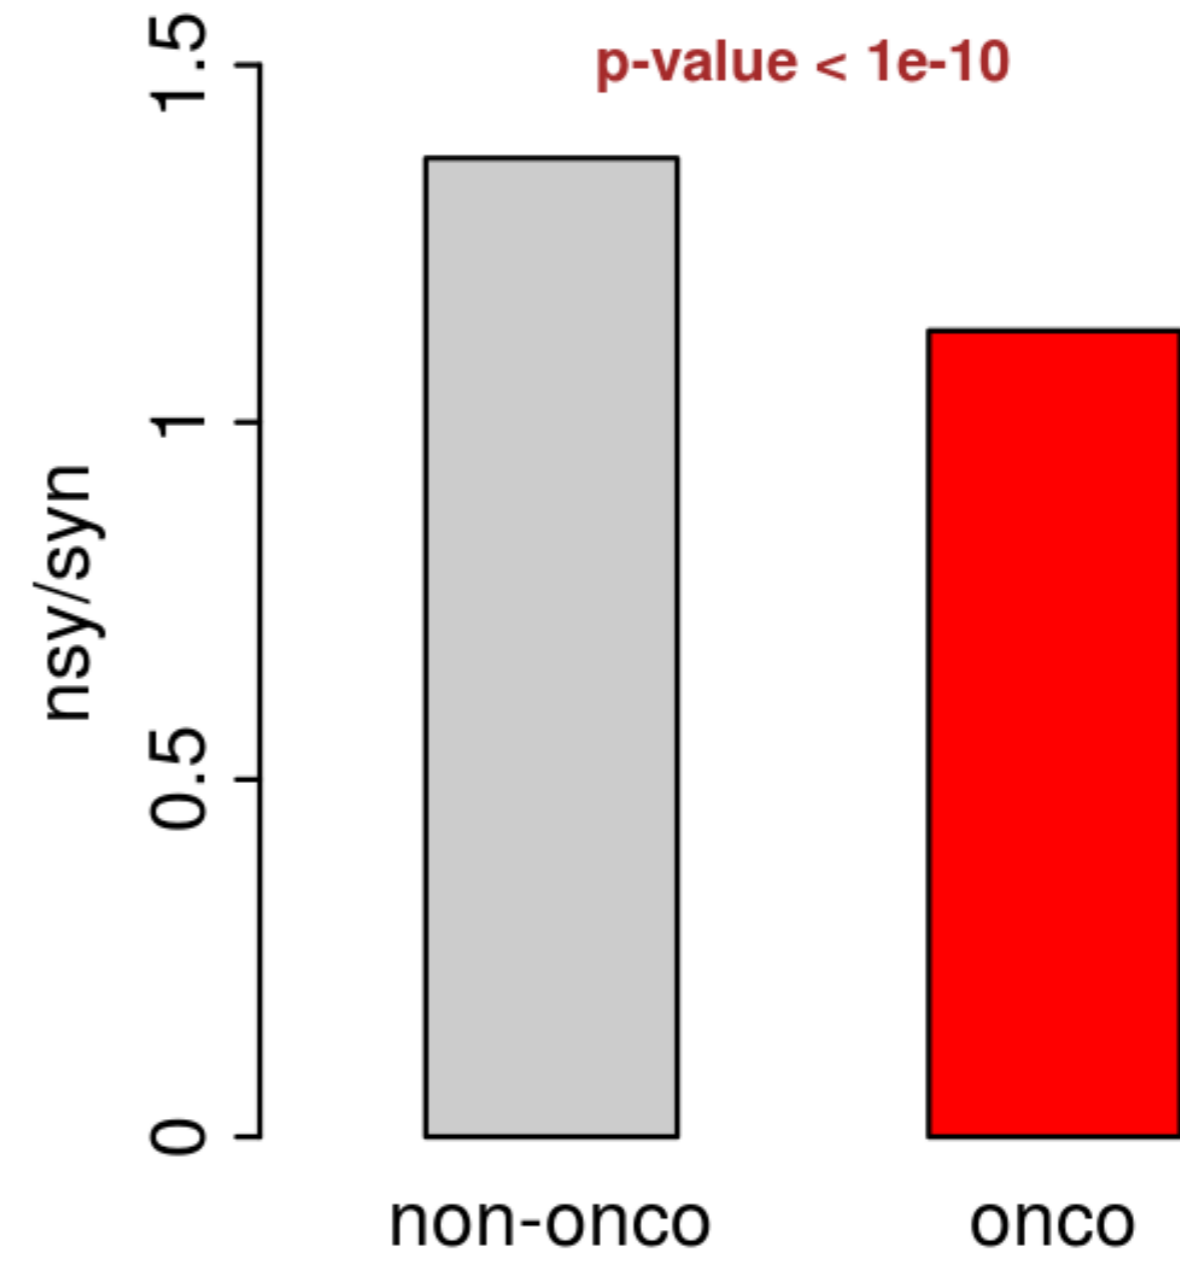

## C

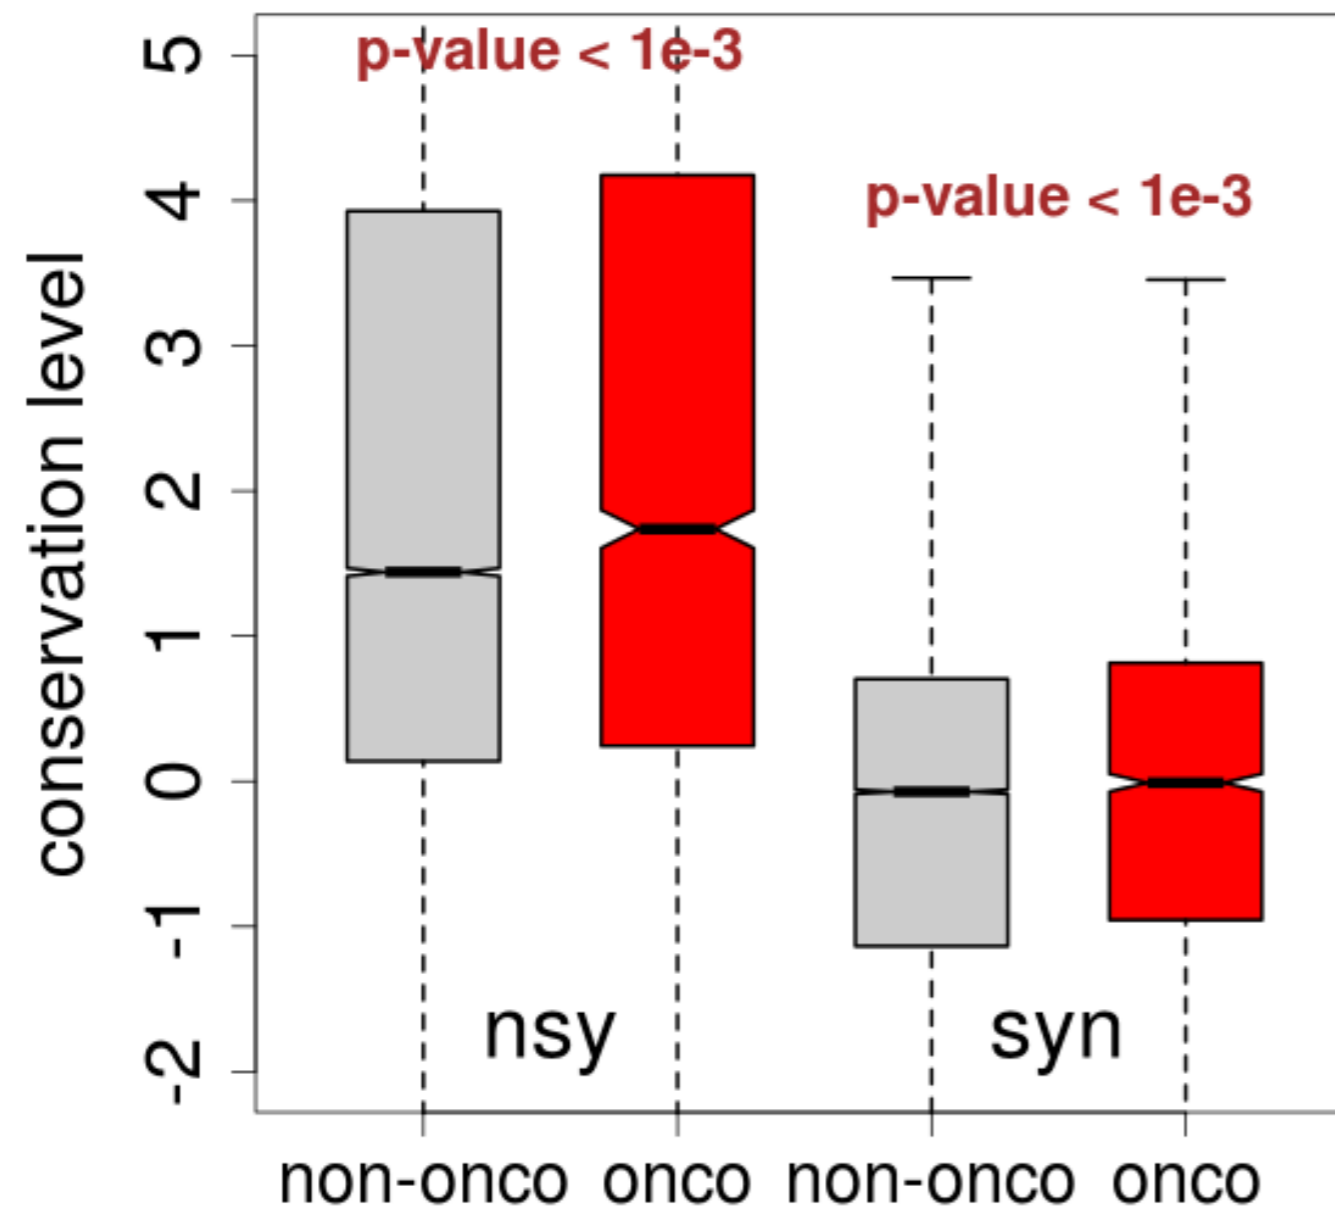

## D

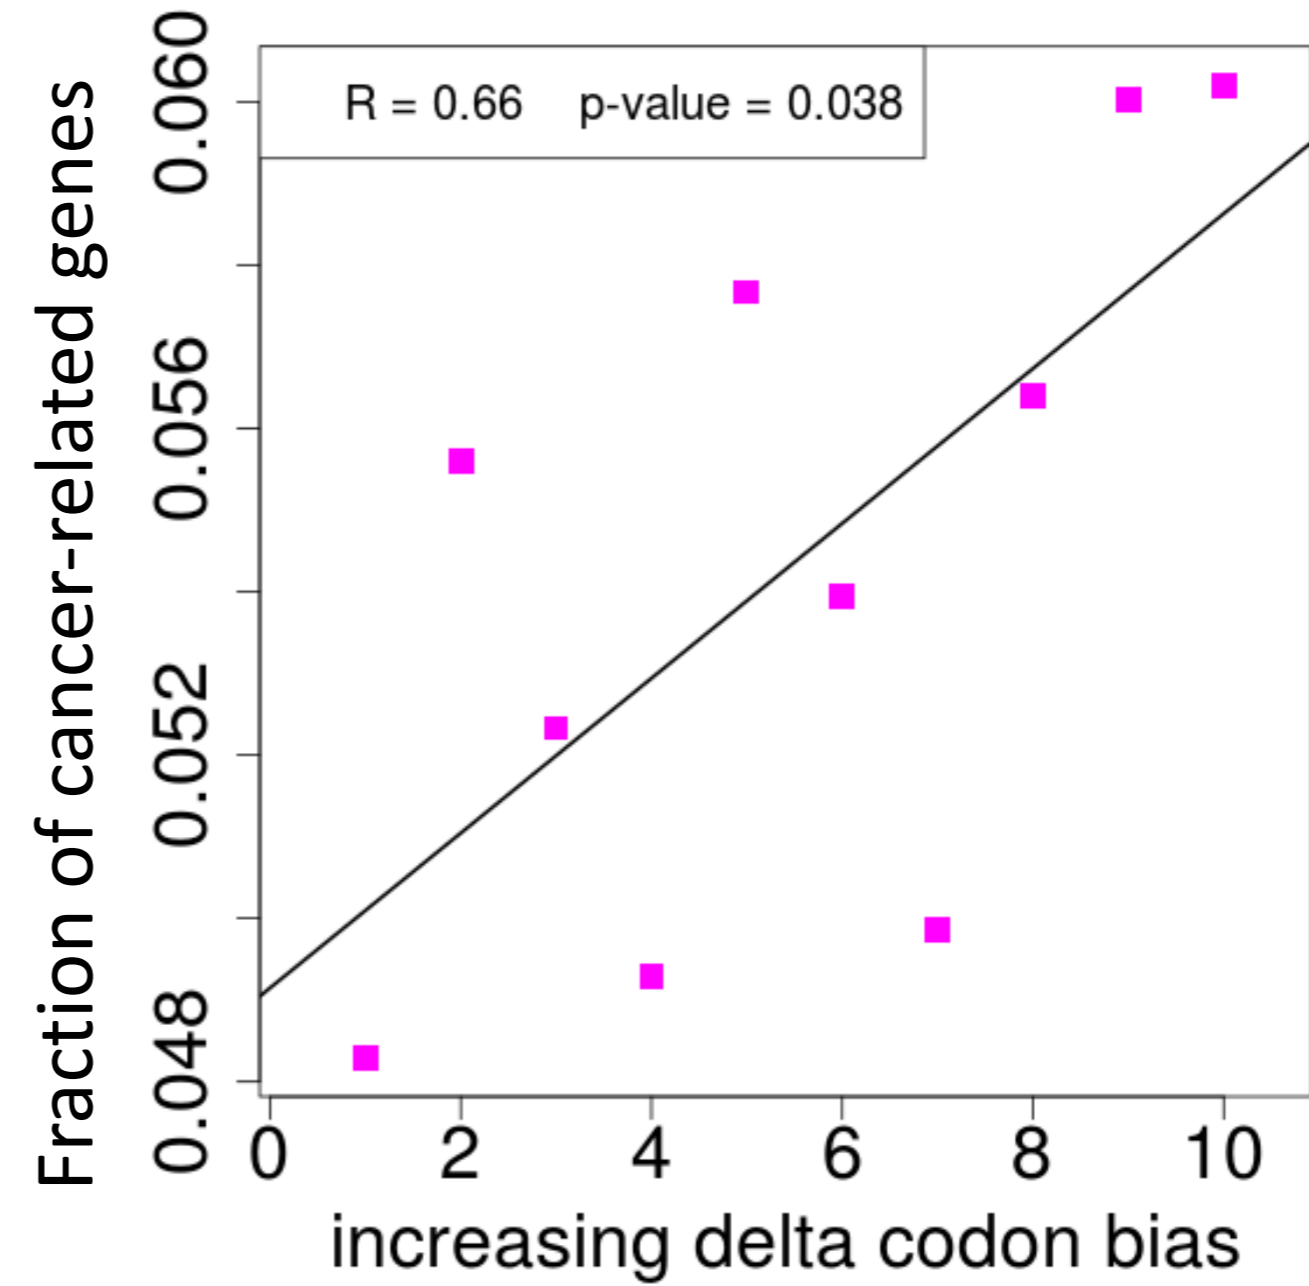

Supplement: MOESM3 [file 16660394]
